# Supplementary material
Source: HighWire-hosted journal article supplement (https://ez-admanager.com/highwire/filestream/161063/field_highwire_adjunct_files/0/lewitt_862.pdf)
Supplement: lewitt_862.pdf [file lewitt_862.pdf]

# パーキンソン病の進行と強く相関する メタボロミクス・バイオマーカー

Metabolomic biomarkers as strong correlates of Parkinson disease progression

Peter A. LeWitt, MD\*;  
Jia Li, PhD;  
Mei Lu, PhD;  
Lining Guo, PhD;  
Peggy Auinger, MS;  
On behalf of the Parkinson  
Study Group-DATATOP  
Investigators

\*Departments of Neurology

Correspondence to  
Dr. LeWitt:  
plewitt1@hfh.org

**目的：**パーキンソン病 (PD) は、黒質線条体のドパミン作動性ニューロン変性以上の全身性の症状を示すことから、PDに特異的な生化学的指標が、全身の代謝環境 (metabolic milieu) または脳脊髄液 (CSF) 分画に認められるか否かを明らかにする。

**方法：**本研究の目標はPD進行のバイオマーカーを発見することであった。ガスクロマトグラフィーおよびタンデム質量分析計に連結した超高速液体クロマトグラフィーを用い、未投薬の軽症PD患者49例 (平均年齢：61.4歳、PDの平均罹病期間：11.4ヵ月) の血漿とCSFにおいて、1.5kDa以下の小分子量成分の濃度を測定した。血漿および髄液検体は、最長24ヵ月の間隔を置いてベースライン時と試験終了時の2回採取した。この期間中にパーキンソン病統一スケール (UPDRS) Part 2+3の平均スコアは47% (28.8から42.2) 増加した。測定した化合物について不偏 (unbiased) 単変量および多変量解析を実施し、least absolute shrinkage and selection operator (LASSO) を用いた変数選択により、データを多重線形回帰に当てはめた。

**結果：**血漿中の生化学物質575種類とCSF中の生化学物質383種類の中から、LASSOにより、ベースライン時から試験終了時のUPDRS Part 2+3スコアの変化と強い正の相関 ( $0.87, p=2.2e^{-16}$ ) を示すベースライン時の血漿生化学物質15種類が選択された。これらのうち3種類はキサンチン構造をもち、4種類は中鎖または長鎖脂肪酸であった。LASSOが選択した15種類のバイオマーカーをパスウェイ・エンリッチメント・ソフトウェアで解析したところ、代謝経路の関与は認められなかった。ドパミン代謝物であるホモバニリン酸のCSF中濃度は、ベースライン時と試験終了時でほとんど変化せず、UPDRS Part 2+3スコアの悪化との相関もごくわずかであった ( $0.29, p=0.041$ )。

**結論：**血漿のメタボロミクス・プロファイリングは、PD進行の予測因子を示し、PDの病因を明らかにするバイオマーカーを示した。

Neurology® 2017; 88: 862-869

図 複合指数とベースライン時から試験終了時のUPDRS Part 2+Part 3スコアの変化との相関

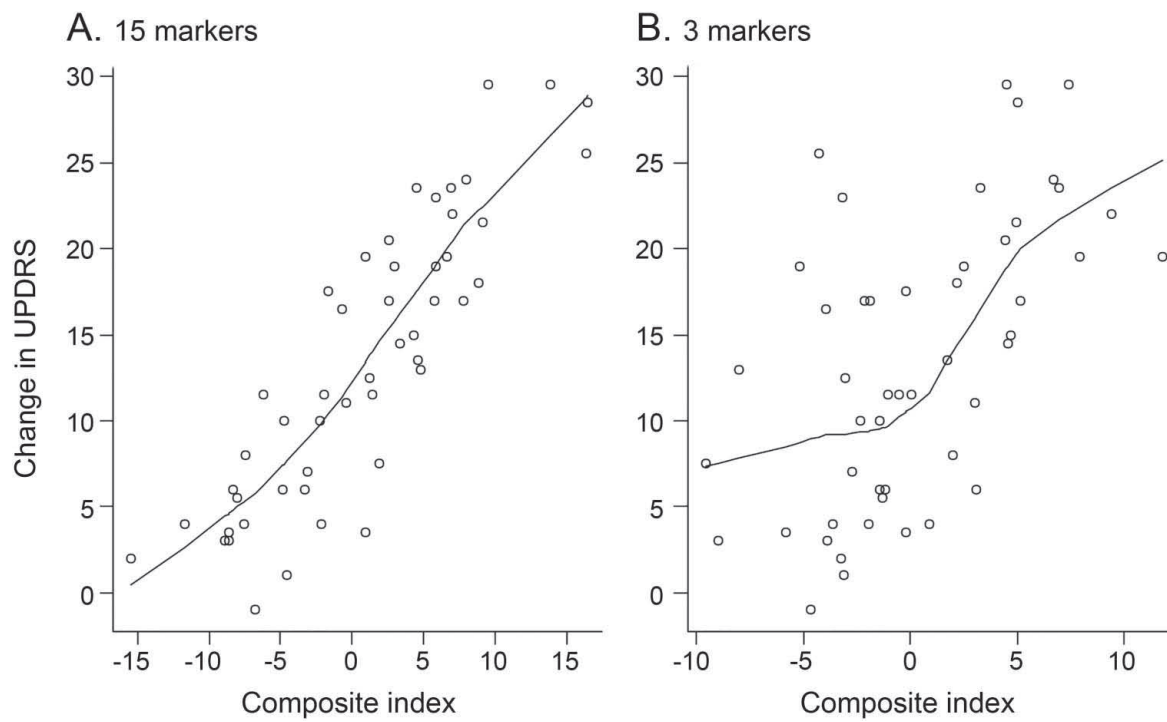

(A) ベースライン時の血漿検体による複合指数 (相関係数=0.87,  $p=2.2e^{-16}$ )。 (B) ベースライン時のCSF検体による複合指数 (相関係数=0.58,  $p=1.33e^{-5}$ )。UPDRS=パーキンソン病統一スケール。
